# Supplementary material for: Animal Models of SARS-CoV-2: A Systematic Review
Source: Preprints.org preprint supplement (doi:10.20944/preprints202007.0079.v1), 2020-07-05
Supplement: Supplementary file 1 [file PRISMA Figure 1.xlsx]

## Sheet: Sheet1
		PRISMA Flow Diagram
		Identification		covid 19 (n-2613)	OR	covid-19 (n-2613)	OR	novel corona virus (n-99)	OR	SARS-CoV-2 (n-1024)
				(((COVID-19) OR COVID 19) OR novel corona virus) OR SARS-CoV-2 (n-2681)
						(((animal models) OR experimental models) OR laboratory models)) (n-2193653)
						AND
				Records identified (n-62)			OR	covid 19 animal models (n-17)
					Duplicates removed; records retrieved & screened (n-67)
		Screening
									Records excluded (n-61)
					Full text articles accessed for eligibility (n-6)
									Full-text articles not-qualifying for inclusion into study (n-4)
		Eligibility			Studies included in the review (n-2)
									Snowballing & reverse snowballing (n-3)
				Studies from regular search + references + citations (n-5)
									Studies (non peer-reviewed) identified upon additional search on Google & Google Scholar (n-4)
		Included
				Studies included in final analysis (n-9)
