# Supplementary material for: Animal Models of SARS-CoV-2: A Systematic Review
Source: Preprints.org preprint supplement (doi:10.20944/preprints202007.0079.v1), 2020-07-05
Supplement: Supplementary file 2 [file Table 1.xlsx]

## Sheet: Sheet1
		Table 1: Characteristics of Studies included for the Review
		Sl.	Title	Authors	Center of Corresponding Author	Name of Journal	Year	Status	Animal under Study	Ethics Statement	Biosafety
		1	Reinfection could not occur in SARS-2 CoV-2 infected rhesus macaques Reinfection could not occur in SARS-2 CoV-2 infected rhesus macaques	Bao et al	Beijing Key Laboratory for Animal Models of Emerging and Remerging Infectious Diseases, NHC Key Laboratory of Human Disease Comparative Medicine, Institute of Laboratory Animal Science, Chinese Academy of Medical Sciences and Comparative Medicine Center, Peking Union Medical College, Beijing, China.	Biorxiv	2020	Biorxiv Pre-print	Monkeys (Rhesus Macaques)	Study approved by the Institutional Animal Care and Use Committee (Ethics number: WIVA42202001) of Wuhan Institute of Virology, Chinese Academy of Sciences.	Experiments were conducted within the animal biosafety level 4 (ABSL–4) facility in National Biosafety Laboratory (Wuhan), Chinese Academy of Sciences
		2	Infection with Novel Coronavirus (SARS-CoV-2) Causes Pneumonia in the Rhesus Macaques	Shan et al	Center for Biosafety Mega-Science, Wuhan Institute of Virology, Chinese Academy of Sciences.	Nature Research	2020	In-Review	Monkeys (Rhesus Macaques)	Study protocols approved by the Institutional Animal Care and Use Committee (IACUC) of the Institute of Laboratory Animal Science, Chinese Academy of Medical Sciences (BLL20001)	Experiments were performed in the animal biosafety level 3 (ABSL3) laboratory
		3	Simulation of the clinical and pathological manifestations of Coronavirus Disease 2019 (COVID-19) in golden Syrian hamster model: implications for disease pathogenesis and transmissibility	Chan et al	State Key Laboratory of Emerging Infectious Diseases, Carol Yu Centre for Infection, Department of Microbiology, Li Ka Shing Faculty of Medicine, The University of Hong Kong, Pokfulam, Hong Kong Special Administrative Region, China.	Clin Infect Dis	2020	Visible on PUBMED	Golden Syrian hamster (Mesocricetus auratus)	Study was approved by the HKU Committee on the Use of Live Animals in Teaching and Research.	All experiments involving live SARS-CoV-2 followed the approved standard operating procedures of the HKU Biosafety Level-3 facility
		4	Pathogenesis and transmission of SARS-CoV-2 virus in golden Syrian hamsters	Sia et al	School of Public Health, LKS Faculty of Medicine, The University of Hong Kong	Nature Research	2020	In-Review	Golden Syrian hamser	The study protocol have been reviewed and approved by the Committee on the Use of Live Animals in Teaching and Research, The University of Hong Kong (CULATR # 5323–20).	All experiments were performed at the BSL–3 core facility, LKS Faculty of Medicine, The University of Hong Kong.
		5	Labs rush to study coronavirus in transgenic animals — some are in short supply	Callaway E	NA	Nature	2020	Visible on PUBMED	hACE2 mice	NA	NA
		6	The Pathogenicity of SARS-CoV-1 2 in hACE2 Transgenic Mice	Bao et al	Key Laboratory of Human Disease Comparative Medicine, Chinese Ministry of Health, Beijing Key Laboratory for Animal Models of Emerging and Remerging Infectious Diseases, Institute of Laboratory Animal Science, Chinese Academy of Medical Sciences and Comparative Medicine Center, Peking Union Medical College, Beijing, China.	Biorxiv	2020	Biorxiv Pre-print	hACE2 mice	All procedures in this study involving animals were reviewed and approved by the Institutional Animal Care and Use Committee of the Institute of Laboratory Animal Science, Peking Union Medical College (BLL20001).	Murine studies were performed in an animal biosafety level 3 (ABSL3) facility using HEPA-filtered isolators
		7	Infection and Rapid Transmission of SARS-CoV-2 in Ferrets	Kim et al	Department of Molecular Microbiology and Immunology, Keck School of Medicine, University of Southern California, Los 27 Angeles, CA 90033, USA	Cell Host and Microbe	2020	Pre-Proof on Journal website (when retrieved); now visible on PUBMED	Ferrets	All animal experiments were approved by the Medical Research Institute, a member of Laboratory Animal Research Center of Chungbuk National University (LARC) (approval number: CBNUA-1352-20-02)	Viruses were handled in an enhanced biosafety level 3 (BSL3) containment laboratory as approved by the Korean Centers for Disease Control and Prevention (KCDC-14-3-07).
		8	This Scientist Hopes to Test Coronavirus Drugs on Animals in Locked-Down Wuhan	Cyranoski D	NA	Nature	2020	Visible on PUBMED	Animals in Wuhan infected with SARS-CoV-2	NA	NA
		9	Susceptibility of ferrets, cats, dogs, and different domestic animals to SARS-coronavirus-2	Shi et al	State Key Laboratory of Veterinary Biotechnology, Harbin Veterinary Research Institute, Chinese Academy of Agricultural Sciences, Harbin 150001, People’s Republic of China, and National High Containment Laboratory for Animal Diseases Control and Prevention, Harbin 150069, People's Republic of China.	Biorxiv	2020	Biorxiv Pre-print (when retrieved); now visible on journal website	Ferrets	The protocols for animal study and animal welfare were reviewed and approved by the Committee on the Ethics of Animal Experiments of the Harbin Veterinary Research Institute of the Chinese Academy of Agricultural Sciences	All experiments with infectious SARS-CoV-2 were performed in the biosafety level 4 and animal biosafety level 4 facilities in the Harbin Veterinary Research Institute of the Chinese Academy of Agricultural Sciences
