# Supplementary material for: Animal Models of SARS-CoV-2: A Systematic Review
Source: Preprints.org preprint supplement (doi:10.20944/preprints202007.0079.v1), 2020-07-05
Supplement: Supplementary file 3 [file Table 2.xlsx]

## Sheet: Sheet1
	Table 2: Detailed Summary of the Studies included in the Review
	Sl.	Title	Authors	Animal under Study	Physiological Exression of human ACE2	Source of virus	Route of Infection	Clinical Manifestations	Viral Replication seen in organs	Upper Respiratory Tract	Lower Respiratory Tract	Peak viral load in lungs	Clearance of virus from Respiratory Tract	HP changes in respiratory tract	HP changes in intestine	HP changes in other organs	Additional Information	Fecal samples	Sero-conversion	Fatality due to disease	Transfer to close contacts	Air-Borne Transmission	Immunoprophylaxis
	1	Reinfection could not occur in SARS-2 CoV-2 infected rhesus macaques Reinfection could not occur in SARS-2 CoV-2 infected rhesus macaques	Bao et al	Rhesus macaques	Yes	Information not available	Intra-tracheal	Weight loss (3/4); reduced apetite, increase respiration & hunched posture (transient)	Viral replication found in nose, pharynx, lung, gut, spinal cord, heart, skeletal muscle, bladder	Highest level of viral load in nasal swab at 3 dpi	Yes	Information not available	Information not available	Mild to moderate interstitial pneumonia	Viral replication found in gut	Information not available	Monkeys (n=2) re-exposed to virus at 28 dpi: Clinical - transient elevation of body temperature Viral replication - nasopharyngeal and anal swab negative for viral load. Antibody titer: Maintained in one, 2.5 times rise in another Monkey (n=1) not re-exposed; followed up longitudinallly for 14 days beyond 28 dpi showed no sign of recurrence	Anal swabs tested positive for viral replication with peak at 3 dpi and clearance of virus at 14 dpi	Yes, 14 dpi	None	Information not available	Information not available	Authors conclusion: Since re-infection could not occur due to the presence of neutralizing antibodies: 1) convalescing patients are unlikely to be contagious, 2) primary infection may be protective against subsequent exposures
	2	Infection with Novel Coronavirus (SARS-CoV-2) Causes Pneumonia in the Rhesus macaques	Shan et al	Rhesus macaques	Yes	Isolated from clinical bronchoalveolar lavage fluid from a confirmed patient in Wuhan, China	Intra-tracheal	None except reduced apetite in 1/6, weight loss (8%) in n=2 between 6-14 dpi	2 peaks of viral RNA in throat swab: 1 dpi & 5 dpi	Yes	Yes	Information not available	9 dpi (throat)	Diffuse Interstitial Pneumonia	Information not available	Information not available	Progressive patchy ground glass opacity on X-Ray; whole genome sequence alignment analysis on virus re-isolated form bronchus, lung tissues and oropharyngeal swab >99.99% identical lto origianl viral sample	Anal viral shedding upto 11 dpi	Yes, 14 dpi	None	Information not available	Information not available	Antibody titer depicted two patterns: - one monkey had low antibody titers at 14 dpi which showed a rising trend at 21 dpi - one monkey had a high titer which persisted at same level on 21 dpi
	3	Simulation of the clinical and pathological manifestations of Coronavirus Disease 2019 (COVID-19) in golden Syrian hamster model: implications for disease pathogenesis and transmissibility	Chan et al	Golden Syrian Hamsters	Yes	Nasopharyngeal aspirate specimen of a confirmed COVID-19 patient in Hong Kong	Intra-nasal inoculation	Yes, weight loss >10%, lethargy, ruffled furs, hunched back posture, rapid breathing	Respiratory tract (nasal turbinate, trachea & lung), Intestine and low mean viral loads in blood & other organs	Yes	Yes	2 & 4 dpi	7 dpi	Iniitial exudative phase (diffuse alveolar damage, extensive apoptosis & viral N protein expression) followed by proliferative phase (tissue repair, pneumocyte proliferaiton & Ki67 protein expression)	Mucosal inflammation, epithelial necrosis, enlargement of Peyer's patches & viral N protein expression	Spleen reduced in size, depletion of white and red pulp, reduced no. and size of follicles; subcapsular and medullary lymphatic sinus ectasia in bronchial & mesenteric lymph nodes; focal myocardial degeneration and interstitial edema	Cytokine storm: Pro-inflammatory cytokines (IFN-𝛄) triggered at 2 dpi, peaked at 4 dpi & resolved at 7dpi (decrease in Type II interferons & pro-inflammatory cytokines like IL-6 & elevation of TGF-β) dropped to basal levels at 7 dpi	Indirect evidence of fecal shedding from hgh viral load and N protein expression in intestine	Yes, 7 dpi	None	Yes	Information not available; feco-oral transmission reserved as a possibility	With early convalescent sera, there was a significant decrease in lung viral load but not in lung pathology
										viral load in nasal turbinate (upper respiratory tract) is one log higher than that in lungs (lower respiratory tract)
	4	Pathogenesis and transmission of SARS-CoV-2 virus in golden syrian hamsters	Sia et al	Golden Syrian Hamsters	Yes	Nasopharyngeal aspirate and throat of first confirmed COVID-19 patient in Hong Kong	Intra-nasal inoculation	Yes, weight loss>10%, ruffled hair coat	Epithelial cells of Respiratory & GI Tracts	Yes	Yes	2 dpi	7 dpi	Yes	No, although viral antigen was detected in epithelial cells of duodenum	None in heart, spleen, liver, brain and kidney	Cytokine storm not studies, absence of histopathological changes in spleen & heart is in contrast to another study with same virus on syrian hamsters (Chan et al @ Sl. 3 in same table)	Viral RNA +nt	Yes, 14 dpi	None	Yes	Information not available	Information not available
	6	The Pathogenicity of SARS-CoV-1 2 in hACE2 Transgenic Mice	Bao et al	Humanized transgenic hACE2 mice	Expressed in transgenic mice	HB-01 strain*	Intra-nasal inoculation	Weight Loss (8% @ 5 dpi) and slight bristles	No	Information not available	Yes	3 dpi	7 dpi	Interstitial pneumonia with lymphocytes and monocytes infiltration in alveolar insterstitium	Not significant	Not significant	IHC identified MAC2+ macrophages, CD3+ T lymphocytes and CD19+ macrophages in lungs, co-localization of SARS-CoV-2 S protein & hACE2 receptor in alveolar epilthelial cells	Information not available	Yes, 21 dpi	None	Information not available	Information not available	Information not available
	7	Infection and Rapid Transmission of SARS-CoV-2 in Ferrets	Kim et al	Ferrets	Yes	Confirmed patient of COVID-19 in South Korea	Intra-nasal inoculation	Yes (fever, reduced activity), occasional cough, no weight loss	Yes (respiratory tract: viral RNA detected & infectious virus isolated); viral RNA detected in blood, intestinal & kidney but virus recovery failed	Viral RNA detected in nasal washes; peak at 4 dpi and undetectable at 10 dpi	Yes (viral RNA detected till 8 dpi; infectious virus isolated @ 4 dpi from lung tissue & @ 8dpi from trachea)	4 dpi	Infectious virus isolated at 8 dpi from nasal turbinate and trachea; detection of viral RNA and virus recovery failed in all organs at 12 dpi	Suggestive of acute bronchiolitis	Viral antigen detected by IHC @ 4 dpi		Transmission from infected ferrets to naïve ferrets in close contact occurred even during asymptomatic period, transmission possible through virus in different body fluids such as urine and feces	Viral RNA +nt, virsu isolated from 2/3 specimens	Yes, 12 dpi consistent with disappearance of symptoms, normal body weight and failed detection of viral RNA	None	Yes	Likely but less robust 2/6 ferrets in indirect contact +ve for viral RNA in nasal washes / fecal specimens; only 1 seroconverted	Information not available
										Viral load was higher in nasal turbinate as compared to lung
	9	Susceptibility of ferrets, cats, dogs, and different domestic animals to SARS-coronavirus-2	Shi et al	Ferrets [remaining part of study did not fit the inclusion criteria)	Yes	1. SARS-CoV-2F-13/environment/2020/Wuhan (F13-E) 2. SARS-CoV-2/Ctan/human/Wuhan (Ctan-H)	Intra-nasal inoculation	Fever, Loss of apetite	Infectious virus detected in nasal turbinate, soft palate and tonsils	Yes	No	Information not available	Information not available	Increased number of Type II pneumocytes, macrophages & neutrophils in the alveolar septa and alveolar lumen, mild peribronchitis in the lungs	Information not available	Lymphoplasmacytic perivasculitis & vasculitis	Cats are also susceptibel to infection to SARS-CoV-2; dogs have low susceptibility while livestock such as pigs, chicken & ducks are not susceptible to infection with this virus.	Viral RNA detected in rectal swab; copy numbers were notably lower, infectious virus not detected	Yes, 13 dpi	None	Information not available	Information not available	Information not available
							Intra-tracheal inoculation		Viral RNA detected in nasal turbinate, soft palate, tonsil and trachea
		* Zhu N, Zhang D, Wang W, Li. X, Yang B, Song J, Zhao X, Huang B, et al. A Novel Coronavirus from Patients with Pneumonia in China, 2019. N Engl J Med 2020; 382:727-733.
